# Supplementary material
Source: Springer Nature journal article supplement (https://www.springermedizin.de/resource/supplementary/12885_2011_2969_MOESM3_ESM.pdf/9462412)

A

PC3

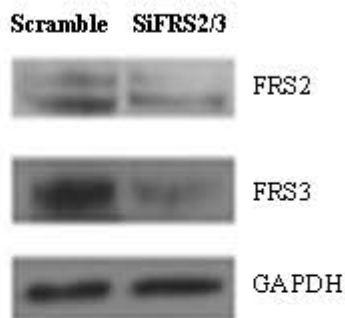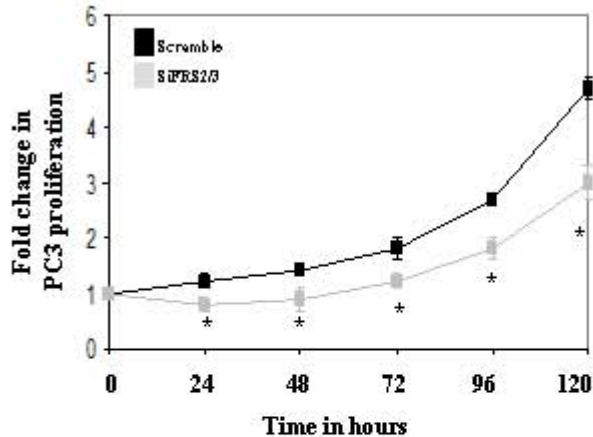

B

DU145

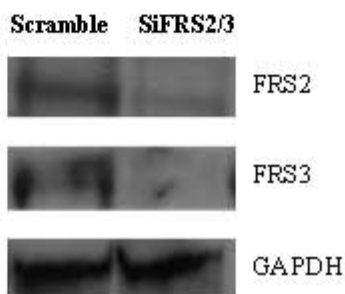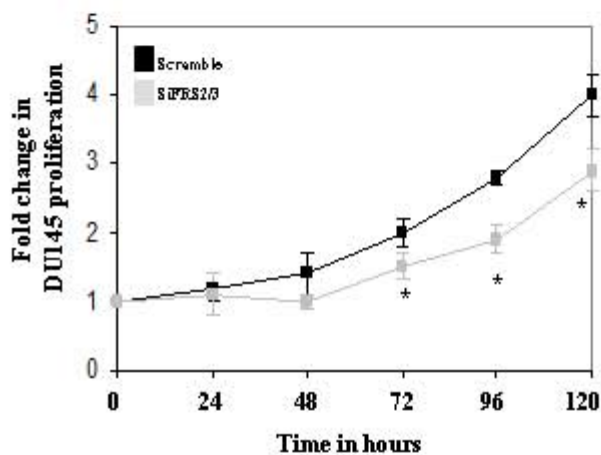

C

PNT2

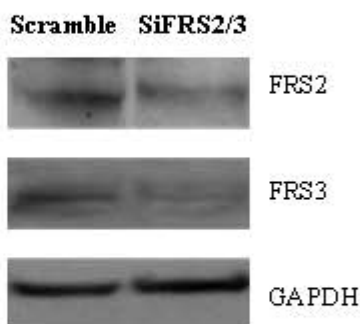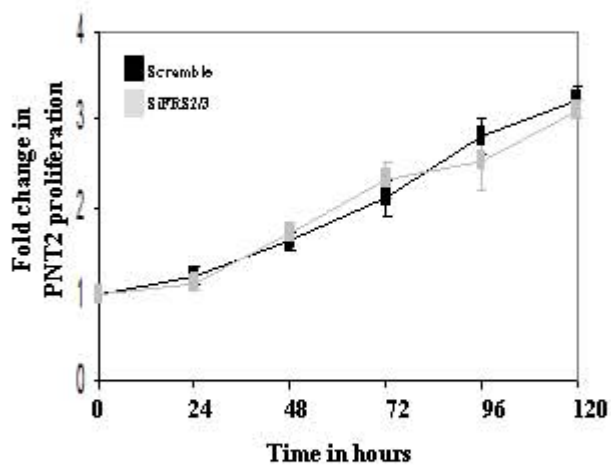

Supplement: MOESM3 [file 9462412]
